# Supplementary material
Source: PubMed Central journal article supplement (PMC5589515)
Supplement: NIHMS897719-supplement-suppl.pdf [file NIHMS897719-supplement-suppl.pdf]

**SUPPLEMENTAL MATERIALS**

**SUPPLEMENTAL TABLE 1: PREVALENCE OF LARGE DRUSEN IN UVEITIS PATIENTS COMPARED TO THE US POPULATION WHEN ADJUSTED FOR AGE AND RACE**

| <b>LARGE DRUSEN IN UVEITIS PATIENTS BY AGE AND RACE</b> |            |                          |                     |                                               |                                          |
|---------------------------------------------------------|------------|--------------------------|---------------------|-----------------------------------------------|------------------------------------------|
| <b>RACE</b>                                             | <b>AGE</b> | <b># Large Drusen Pt</b> | <b># Uveitis Pt</b> | <b>Prevalence/100 pt (95% CI<sup>a</sup>)</b> |                                          |
|                                                         |            |                          |                     | <b>Uveitis Cohort</b>                         | <b>General US Population<sup>b</sup></b> |
| WHITE                                                   | 55-59      | 0                        | 23                  | 0.0 (0.0-16.0)                                | 3.7(3.7-3.8)                             |
|                                                         | 60-64      | 1                        | 26                  | 3.8 (0.0-21.4)                                | 5.4(5.3-5.4)                             |
|                                                         | 65-69      | 0                        | 13                  | 0.0 (0.0-28.4)                                | 7.7(7.6-7.7)                             |
|                                                         | 70-74      | 0                        | 12                  | 0.0(0.0-30.7)                                 | 10.8(10.8-10.9)                          |
|                                                         | 75-79      | 0                        | 9                   | 0.0 (0.0-41.0)                                | 15.1(15.1-15.2)                          |
|                                                         | ≥80        | 1                        | 4                   | 25.0 (0.0-139.2)                              | 28.0(28.0-28.0)                          |
| BLACK                                                   | 55-59      | 0                        | 28                  | 0.0 (0.0-13.2)                                | 5.1(5.1-5.1)                             |
|                                                         | 60-64      | 1                        | 14                  | 7.1 (0.2-39.8)                                | 6.0(5.9-6.0)                             |
|                                                         | 65-69      | 0                        | 12                  | 0.0 (0.0-30.7)                                | 7.0(7.0-7.1)                             |
|                                                         | 70-74      | 0                        | 3                   | 0.0 (0.0-123.0)                               | 8.2(8.2-8.3)                             |
|                                                         | 75-79      | 0                        | 6                   | 0.0 (0.0-61.4)                                | 9.7(9.6-9.8)                             |
|                                                         | ≥80        | 1                        | 3                   | 33.3 (0.8-185.7)                              | 12.7(12.6-12.8)                          |
| ALL                                                     | 55-59      | 0                        | 55                  | 0.0 (0.0-6.7)                                 | 4.0 (3.7-4.2)                            |
|                                                         | 60-64      | 2                        | 43                  | 4.7 (0.6-16.8)                                | 5.4 (5.1-5.7)                            |
|                                                         | 65-69      | 0                        | 32                  | 0.0 (0.0-11.5)                                | 7.4 (7.1-7.8)                            |
|                                                         | 70-74      | 0                        | 18                  | 0.0 (0.0-20.5)                                | 10.2 (9.7-10.8)                          |
|                                                         | 75-79      | 0                        | 15                  | 0.0 (0.0-24.6)                                | 14.1 (13.2-15.0)                         |
|                                                         | ≥80        | 2                        | 7                   | 28.6 (3.5-103.2)                              | 23.6 (21.5-25.6)                         |

Pt=patients, CI=Confidence interval

a. 95% CIs for the prevalence of large drusen in the uveitis cohort were calculated using Poisson distribution. 95% CIs for the prevalence of large drusen in the general US population were calculated using the modified Wald method.

b. Prevalence of large drusen cases in the general US population was estimated by using the numerators reported by Friedman et al [1] with the 2000 US Census [15] population data denominators.

**SUPPLEMENTAL TABLE 2: PREVALENCE OF LARGE DRUSEN IN UVEITIS PATIENTS STRATIFIED BY AGE, RACE, AND ANATOMICAL TYPE OF UVEITIS**

| <b>LARGE DRUSEN IN UVEITIS PATIENTS BY AGE, RACE, UVEITIS ANATOMICAL LOCATION<sup>a</sup></b> |                         |                          |                     |                                               |                                              |                     |                                               |
|-----------------------------------------------------------------------------------------------|-------------------------|--------------------------|---------------------|-----------------------------------------------|----------------------------------------------|---------------------|-----------------------------------------------|
|                                                                                               | <b>Anterior Uveitis</b> |                          |                     |                                               | <b>Posterior Segment Uveitis<sup>b</sup></b> |                     |                                               |
| <b>RACE</b>                                                                                   | <b>AGE</b>              | <b># Large Drusen Pt</b> | <b># Uveitis Pt</b> | <b>Prevalence/ 100pt (95% CI<sup>c</sup>)</b> | <b># Large Drusen Pt</b>                     | <b># Uveitis Pt</b> | <b>Prevalence/ 100pt (95% CI<sup>c</sup>)</b> |
| WHITE                                                                                         | 55-59                   | 0                        | 6                   | 0.0 (0.0-35.7)                                | 0                                            | 17                  | 0.0 (0.0-16.2)                                |

|              |                    |          |           |                        |          |            |                      |
|--------------|--------------------|----------|-----------|------------------------|----------|------------|----------------------|
|              | 60-64              | 1        | 6         | 16.7 (0.4-92.9)        | 0        | 20         | 0.0 (0.0-14.1)       |
|              | 65-69              | 0        | 3         | 0.0 (0.0-53.0)         | 0        | 10         | 0.0 (0.0-24.9)       |
|              | 70-74              | 0        | 2         | 0.0 (0.0-63.1)         | 0        | 10         | 0.0 (0.0-24.9)       |
|              | 75-79              | 0        | 0         | -                      | 0        | 9          | 0.0 (0.0-26.9)       |
|              | ≥80                | 0        | 1         | 0.0 (0.0-77.7)         | 1        | 3          | 33.3 (0.8-185.7)     |
|              | Total              | <b>1</b> | <b>18</b> | <b>5.6 (0.1-31.0)</b>  | <b>1</b> | <b>69</b>  | <b>1.4 (0.0-8.5)</b> |
| <b>BLACK</b> | 55-59              | 0        | 8         | 0.0 (0.0-29.3)         | 0        | 20         | 0.0 (0.0-14.1)       |
|              | 60-64              | 1        | 4         | 25.0(0.6-139.3)        | 0        | 10         | 0.0 (0.0-24.9)       |
|              | 65-69              | 0        | 3         | 0.0 (0.0-53.0)         | 0        | 9          | 0.0 (0.0-26.9)       |
|              | 70-74              | 0        | 2         | 0.0 (0.0-63.1)         | 0        | 1          | 0.0 (0.0-77.7)       |
|              | 75-79              | 0        | 3         | 0.0 (0.0-53.0)         | 0        | 3          | 0.0 (0.0-53.0)       |
|              | ≥80                | 1        | 2         | 50.0(1.3-278.6)        | 0        | 1          | 0.0 (0.0-77.7)       |
|              | Total              | <b>2</b> | <b>22</b> | <b>9.1 (1.1-32.8)</b>  | <b>0</b> | <b>44</b>  | <b>0.0 (0.0-6.9)</b> |
| <b>ALL</b>   | 55-59              | 0        | 16        | 0.0 (0.0-17.1)         | 0        | 39         | 0.0 (0.0-7.8)        |
|              | 60-64              | 2        | 11        | 18.2 (2.2-65.7)        | 0        | 32         | 0.0 (0.0-9.3)        |
|              | 65-69              | 0        | 10        | 0.0 (0.0-24.9)         | 0        | 22         | 0.0 (0.0-13.0)       |
|              | 70-74              | 0        | 5         | 0.0 (0.0-40.1)         | 0        | 13         | 0.0 (0.0-20.3)       |
|              | 75-79              | 0        | 3         | 0.0 (0.0-53.0)         | 0        | 12         | 0.0 (0.0-21.6)       |
|              | ≥80                | 1        | 3         | 33.3(0.8-185.7)        | 1        | 4          | 25.0 (0.6-139.3)     |
|              | Total <sup>d</sup> | <b>3</b> | <b>48</b> | <b>6.25 (1.3-18.3)</b> | <b>1</b> | <b>122</b> | <b>0.8 (0.0-4.6)</b> |

Pt=patients, CI=Confidence interval

a. Anatomic subtype of uveitis was classified according to Standardization of Uveitis Nomenclature Working Group definitions.[14]

b. Posterior segment uveitis includes intermediate, posterior, and panuveitis.

c. 95% CIs calculated using Poisson distribution.

d. Comparing the proportion of patients with large drusen among subgroups based on uveitis anatomic subtype (anterior versus posterior segment uveitis) using a two-tailed Fisher's exact test yields a p-value of 0.07.

SUPPLEMENTAL TABLE 3: PREVALENCE OF LARGE DRUSEN IN UVEITIS PATIENTS STRATIFIED BY RACE, AGE, AND DURATION OF TREATMENT.

| <b>LARGE DRUSEN IN UVEITIS PATIENTS BY AGE, RACE, SYSTEMIC IMMUNOMODULATORY TREATMENT DURATION<sup>a</sup></b> |            |                                      |                     |                                               |                                       |                     |                                               |
|----------------------------------------------------------------------------------------------------------------|------------|--------------------------------------|---------------------|-----------------------------------------------|---------------------------------------|---------------------|-----------------------------------------------|
| <b>RACE</b>                                                                                                    | <b>AGE</b> | <b>LESS than 1 year of Treatment</b> |                     |                                               | <b>GREATER than 1 yr of Treatment</b> |                     |                                               |
|                                                                                                                |            | <b># Large Drusen Pt</b>             | <b># Uveitis Pt</b> | <b>Prevalence/ 100pt (95% CI<sup>b</sup>)</b> | <b># Large Drusen Pt</b>              | <b># Uveitis Pt</b> | <b>Prevalence/100 pt (95% CI<sup>b</sup>)</b> |
| <b>WHITE</b>                                                                                                   | 55-59      | 0                                    | 12                  | 0.0 (0.0-30.7)                                | 0                                     | 11                  | 0.0 (0.0-33.5)                                |
|                                                                                                                | 60-64      | 0                                    | 13                  | 0.0 (0.0-28.4)                                | 1                                     | 13                  | 7.7 (0.2-42.9)                                |
|                                                                                                                | 65-69      | 0                                    | 7                   | 0.0 (0.0-52.7)                                | 0                                     | 6                   | 0.0 (0.0-61.5)                                |
|                                                                                                                | 70-74      | 0                                    | 8                   | 0.0 (0.0-46.1)                                | 0                                     | 4                   | 0.0 (0.0-92.2)                                |
|                                                                                                                | 75-79      | 0                                    | 4                   | 0.0 (0.0-92.2)                                | 0                                     | 5                   | 0.0 (0.0-73.8)                                |

|              |                    |          |           |                       |          |           |                       |
|--------------|--------------------|----------|-----------|-----------------------|----------|-----------|-----------------------|
|              | ≥80                | 1        | 3         | 33.3(0.8-185.7)       | 0        | 1         | 0.0 (0.0-368.9)       |
|              | <b>Total</b>       | <b>1</b> | <b>47</b> | <b>2.1 (0.1-11.9)</b> | <b>1</b> | <b>40</b> | <b>2.5 (0.1-13.9)</b> |
| <b>BLACK</b> | 55-59              | 0        | 10        | 0.0 (0.0-36.9)        | 0        | 18        | 0.0 (0.0-20.5)        |
|              | 60-64              | 0        | 9         | 0.0 (0.0-41.0)        | 1        | 5         | 20.0 (0.5-111.4)      |
|              | 65-69              | 0        | 9         | 0.0 (0.0-41.0)        | 0        | 3         | 0.0 (0.0-123.0)       |
|              | 70-74              | 0        | 2         | 0.0 (0.0-184.5)       | 0        | 1         | 0.0 (0.0-368.9)       |
|              | 75-79              | 0        | 4         | 0.0 (0.0-92.2)        | 0        | 2         | 0.0 (0.0-184.5)       |
|              | ≥80                | 0        | 1         | 0.0 (0.0-368.9)       | 1        | 2         | 50.0 (1.3-278.6)      |
|              | <b>Total</b>       | <b>0</b> | <b>35</b> | <b>0.0 (0.0-10.5)</b> | <b>2</b> | <b>31</b> | <b>6.5 (0.8-23.3)</b> |
| <b>ALL</b>   | 55-59              | 0        | 26        | 0.0 (0.0-14.2)        | 0        | 29        | 0.0 (0.0-12.7)        |
|              | 60-64              | 0        | 24        | 0.0 (0.0-15.4)        | 2        | 19        | 10.5 (1.3-38.0)       |
|              | 65-69              | 0        | 19        | 0.0 (0.0-19.4)        | 0        | 13        | 0.0 (0.0-28.4)        |
|              | 70-74              | 0        | 12        | 0.0 (0.0-30.7)        | 0        | 6         | 0.0 (0.0-61.5)        |
|              | 75-79              | 0        | 8         | 0.0 (0.0-46.1)        | 0        | 7         | 0.0 (0.0-52.7)        |
|              | ≥80                | 1        | 4         | 25.0(0.6-139.3)       | 1        | 3         | 33.3 (0.8-185.7)      |
|              | Total <sup>c</sup> | <b>1</b> | <b>93</b> | <b>1.1 (0.0-6.4)</b>  | <b>3</b> | <b>77</b> | <b>3.9 (0.8-11.4)</b> |

Pt=patients, CI=Confidence interval

- a. Systemic immunomodulatory therapy includes included systemic corticosteroids, non-biologic immunosuppressives (such as antimetabolites, T-cell inhibitors, and cytotoxic agents), or biologic immunosuppressives.
- b. 95% CIs calculated using Poisson distribution.
- c. Comparing the proportion of patients with large drusen among subgroups based on systemic immunomodulatory treatment duration ( >1 year versus ≤1 year) using a two-tailed Fisher's exact test yields a p-value of 0.33.
